# Supplementary material
Source: PubMed Central journal article supplement (PMC6408337)
Supplement: rsif20180638supp1.pdf [file rsif20180638supp1.pdf]

# Investigation of strontium transport and strontium quantification in cortical rat bone by time-of-flight secondary ion mass spectrometry

Christine Kern<sup>1</sup>, Mandy Quade<sup>2</sup>, Seemun Ray<sup>3</sup>, Jürgen Thomas<sup>4</sup>, Matthias Schumacher<sup>2</sup>, Thomas Gemming<sup>4</sup>, Michael Gelinsky<sup>2</sup>, Volker Alt<sup>3</sup>, Marcus Rohnke<sup>1,\*</sup>

(1) *Institute of Physical Chemistry, Justus-Liebig-University Giessen, Heinrich-Buff-Ring 17, 35392 Giessen, Germany*

(2) *Centre for Translational Bone, Joint and Soft Tissue Research, Medical Faculty and University Hospital, Technische Universität Dresden, Fetscherstrasse 74, 01307 Dresden, Germany*

(3) *Experimental Trauma Surgery, Justus-Liebig University Giessen, Aulweg 128, 35392 Giessen, Germany*

(4) *IFW Dresden, Institute for Complex Materials, Helmholtzstrasse 20, 01069 Dresden, Germany*

\* Corresponding author. E-mail address: [Marcus.Rohnke@phys.chemie.uni-giessen.de](mailto:Marcus.Rohnke@phys.chemie.uni-giessen.de), Tel: ++49 641 99

34502, Fax: ++49 641 99 34509

## Experimental procedure

### *Preparation of bone samples*

The experimental group OVX rats received a diet deficient in several elements when compared to the group SHAM, which received a standard diet (Altromin-C1034 and C100, respectively; Altromin-Spezialfutter GmbH, Germany, Table S1).

**Table S 1: Ingredients of both standard and multi – deficiencies diet**

| <b>Ingredients</b>       | <b>Units</b> | <b>Content/normal</b> | <b>content / diet</b> |
|--------------------------|--------------|-----------------------|-----------------------|
| Alanine                  | mg/kg        | 2528                  | 8703.23               |
| aluminum                 | mg/kg        | 3.706                 | 3.566                 |
| Arachidic C-20: 0        | mg/kg        | 250                   | 250                   |
| Arachidonic acid C 20: 4 | mg/kg        | 2.5                   | 2.5                   |
| Arginine                 | mg/kg        | 9828.79               | 11513.058             |

|                              |         |           |            |
|------------------------------|---------|-----------|------------|
| Aspartic acid                | mg/kg   | 3583.14   | 15052.732  |
| Behenic C-22: 0              | mg/kg   | 250       | 250        |
| Benzoic acid                 | mg/kg   | 100       | 100        |
| Biotin                       | mg/kg   | 0.201     | 0.5        |
| Calcium                      | mg/kg   | 9310.506  | 1367.728   |
| Capric acid C-10: 0          | mg/kg   | 2.5       | 2.5        |
| Chlorine                     | mg/kg   | 3630000   | 3943.798   |
| Choline chloride             | mg/kg   | 1011.5    | 1002.875   |
| Cobalt                       | mg/kg   | 0.147     | 0.148      |
| Copper                       | mg/kg   | 5.751     | 5.366      |
| Crude Ash                    | mg/kg   | 54943.225 | 20165.35   |
| Crude Fat                    | mg/kg   | 50830     | 50651      |
| Crude Fiber                  | mg/kg   | 40450     | 40544.725  |
| Crude Protein                | mg/kg   | 176115    | 180682.875 |
| Cystine                      | mg/kg   | 3196.18   | 4033.917   |
| Digest.Phosphorus            | mg/kg   | 7199.565  | 475.212    |
| Disaccharide                 | mg/kg   | 110960.5  | 98216.06   |
| Docosahexaenoic acid C22: 6  | mg/kg   | 2.5       | 2.5        |
| Eicosadienoic C-20: 2        | mg/kg   | 250       | 250        |
| Eicosaenoic acid C-20: 1     | mg/kg   | 250       | 250        |
| Eicosapentaenoic acid C20: 5 | mg/kg   | 2.5       | 2.5        |
| Energie/Metab.               | kcal/kg | 3518.055  | 3662.779   |
| Erucic acid C-22: 1          | mg/kg   | 2.5       | 2.5        |
| Fluorine                     | mg/kg   | 4.17      | 3.584      |
| Folic acid                   | mg/kg   | 10.0024   | 10.0006    |
| Glutamic acid                | mg/kg   | 23674.97  | 25377.87   |
| Glycine                      | mg/kg   | 3136      | 5905.315   |
| Histidine                    | mg/kg   | 5275.79   | 6190.55    |
| Inositol                     | mg/kg   | 111       | 102.75     |
| Iodine                       | mg/kg   | 0.514     | 0.396      |
| Iron                         | mg/kg   | 178.579   | 179.188    |
| Isoleucine                   | mg/kg   | 7222.82   | 8811.956   |
| Lauric acid C 12: 0          | mg/kg   | 2.5       | 2.5        |
| Leucine                      | mg/kg   | 14762.77  | 16897.134  |
| Linoleic C18: 2              | mg/kg   | 35050     | 35050      |
| Linolenic C18: 3             | mg/kg   | 150       | 150        |
| Lysine                       | mg/kg   | 17400.97  | 15933.41   |
| Magnesium                    | mg/kg   | 683.506   | 666.622    |
| Manganese                    | mg/kg   | 100.888   | 99.984     |
| margaric                     | mg/kg   | 2.5       | 2.5        |
| Methionine                   | mg/kg   | 10688     | 7689.508   |
| Moisture                     | mg/kg   | 81735.625 | 81323.725  |
| Molybdenum                   | mg/kg   | 0.198     | 19.825     |
| Myristinsäure C-14: 0        | mg/kg   | 2.5       | 2.5        |
| Nervonic C-24: 1             | mg/kg   | 2.5       | 2.5        |
| Nicotinic acid               | mg/kg   | 50.17     | 50.043     |
| Oleic acid C-18: 1           | mg/kg   | 10950     | 10950      |
| Palmitic acid C16: 0         | mg/kg   | 2700      | 2700       |
| Palmitoleic acid C-16: 1     | mg/kg   | 2.5       | 2.5        |
| Pantothenic acid             | mg/kg   | 50.106    | 50.027     |

|                           |         |          |           |
|---------------------------|---------|----------|-----------|
| Pentadecanoic C-15: 0     | mg/kg   | 2.5      | 2.5       |
| Phenylalanine             | mg/kg   | 7171.97  | 11759.017 |
| Phosphorus                | mg/kg   | 7522.765 | 533.069   |
| Polysaccharide            | mg/kg   | 471700   | 513151.75 |
| Potassium                 | mg/kg   | 7088.682 | 5200.773  |
| Proline                   | mg/kg   | 12762.98 | 9855.784  |
| Selenium                  | mg/kg   | 0.334    | 0.283     |
| Serine                    | mg/kg   | 5267.8   | 10880.31  |
| Sodium                    | mg/kg   | 2488.262 | 2076.593  |
| Stearic acid C-18: 0      | mg/kg   | 1250     | 1250      |
| Sulfur                    | mg/kg   | 2791.54  | 3180.027  |
| Threonine                 | mg/kg   | 7154.17  | 8376.773  |
| tricosanoic               | mg/kg   | 2.5      | 2.5       |
| Tryptophan                | mg/kg   | 1976.96  | 2127.1    |
| Tyrosine                  | mg/kg   | 9285.01  | 8266.867  |
| Valine                    | mg/kg   | 3296.14  | 10181.275 |
| Vitamin A                 | I.E./kg | 15000    | 15000     |
| Vitamin B1                | mg/kg   | 20.04    | 20.01     |
| Vitamin B12               | mg/kg   | 0.03     | 0.03      |
| Vitamin B2                | mg/kg   | 20.322   | 20.081    |
| Vitamin B6                | mg/kg   | 15.034   | 15.009    |
| Vitamin C                 | mg/kg   | 20       | 19.5      |
| Vitamin D3                | I.E./kg | 500      | 0         |
| Vitamin E                 | mg/kg   | 163.9    | 163.6     |
| Vitamin K3 (as Menadione) | mg/kg   | 10       | 5         |
| Zinc                      | mg/kg   | 29.299   | 31.433    |
